# Supplementary material for: High biodegradability of water-soluble organic carbon in soils at the southern margin of the boreal forest
Source: Copernicus journal article supplement (doi:10.5194/egusphere-2025-126), 2025-02-07
Supplement: Supplementary file 1 [file egusphere-2025-126-supplement.pdf]

# High biodegradability of water-soluble organic carbon in soils at the southern margin of the boreal forest

Supplementary Text:2

Supplementary Table:1

Supplementary Text

## S1. Additional details of the analysis of WSOM by spectroscopy

Fluorescence Regional Integration (FRI) and the percentage of fluorescence response ( $P_{i,n}$ ) were used for further analysis of the fluorescence spectra in five regions. The volume of the Excitation-Emission Matrix (EEM)  $i(\Phi_i)$  was obtained through the formula (1) by integrating the area under the excitation-emission spectra.  $\Delta\lambda_{ex}$  and  $\Delta\lambda_{em}$  represent the intervals of excitation and emission wavelengths, respectively.  $I(\lambda_{ex}\lambda_{em})$  is the fluorescence intensity for each matching set of excitation-emission wavelengths.  $MF_i$  is the multiplication factor for each region. The normalized volumes of the excitation-emission regions ( $\Phi_{i,n}$ ,  $\Phi_{T,n}$ ) and the percentage of fluorescence response ( $P_{i,n}$ ) were calculated using the following formulas (Chen et al., 2003):

$$\Phi_i = \sum_{ex} \sum_{em} I(\lambda_{ex}\lambda_{em}) \Delta\lambda_{ex} \Delta\lambda_{em}$$

$$\Phi_{i,n} = MF_i \Phi_i$$

$$\Phi_{i,n} = \sum_{i=1}^5 \Phi_{i,n}$$

$$P_{i,n} = \frac{\Phi_{i,n}}{\Phi_{T,n}} \times 100\%$$

## S2. Calculation of BWSOC content and $k$

The calculation formulas for the content and relative proportion of BWSOC under specific incubation days are as follows (Houston, 2012; Vonk et al., 2015):

$$BWSOC_t = WSOC_{t=0} - WSOC_t$$

$$BWSOC(\%)_t = \frac{BWSOC_t}{WSOC_{t=0}} \times 100\% = \frac{WSOC_{t=0} - WSOC_t}{WSOC_{t=0}} \times 100\%$$

Microbial utilization of low-concentration substrates follows first-order reaction kinetics, wherein the change in BWSOC over time follows the formula:

$$\frac{dBWSOC}{dt} = kBWSOC$$

Where BWSOC represents the microbial degradable water-soluble organic carbon at any given time,  $k$  is the reaction kinetic constant, and  $t$  is the incubation time. Integrating the above equation yields:

$$BWSOC = BWSOC_u \times e^{-kt}$$

Where  $BWSOC_u$  is the total amount of microbial degradable water-soluble organic carbon in the substrate. Therefore, the value of  $BWSOC_t$  at any incubation time  $t$  can be expressed as:

$$BWSOC_t = BWSOC_u \times (1 - e^{-kt})$$

Non-linear exponential fitting is performed on  $BWSOC_t$  to obtain the reaction kinetic constant  $k$  value.

#### Supplementary Table

**Table S1. Partition range of fluorescence spectra, Ex represents the excitation wavelength, and Em represents the emission wavelength.**

| Region | Ex      | Em      | Component                               |
|--------|---------|---------|-----------------------------------------|
| I      | 220-250 | 250-330 | Tyrosine-like aromatic protein          |
| II     | 220-250 | 330-380 | Tryptophan-like aromatic protein        |
| III    | 220-250 | 380-500 | Fulvic acid-like matter                 |
| IV     | 250-400 | 250-380 | Soluble microbial byproduct-like matter |
| V      | 250-400 | 380-500 | Humic acid-like matter                  |

#### Reference

- Chen, W., Westerhoff, P., Leenheer, J. A., and Booksh, K.: Fluorescence Excitation–Emission Matrix Regional Integration to Quantify Spectra for Dissolved Organic Matter, *Environmental Science & Technology*, 37, 5701-5710, 10.1021/es034354c, 2003.
- Houston, P. L.: Chemical kinetics and reaction dynamics, Courier Corporation 2012.
- Vonk, J. E., Tank, S. E., Mann, P. J., Spencer, R. G. M., Treat, C. C., Striegl, R. G., Abbott, B. W., and Wickland, K. P.: Biodegradability of dissolved organic carbon in permafrost soils and aquatic systems: a meta-analysis, *Biogeosciences*, 12, 6915-6930, 10.5194/bg-12-6915-2015, 2015.
